# Supplementary material for: High-intensity acute exercise impacts motor learning in healthy older adults
Source: Research Square preprint supplement (doi:10.21203/rs.3.rs-3122105/v1), 2023-07-24
Supplement: Supplementary file 1 [file 2cafd6a3d487c1c391e631f0.docx]

**Supplementary Material:** **“High-intensity acute exercise impacts motor learning in healthy older adults”**

Eleanor M. Taylor1, Claire J. Cadwallader1, Dylan Curtin1, Trevor T.J. Chong1,2,3, Joshua J. Hendrikse1, and James P. Coxon1

**Contents**

**Supplementary Methods (pp. 2 – 5)**

Linear mixed model fitting

Supplementary Table 1: Model fitting for acquisition - skill measure

Supplementary Table 2: Model fitting for acquisition - force error

Supplementary Table 3: Model fitting for acquisition - trial time

Supplementary Table 4: Model fitting for retention - skill measure

Supplementary Table 5: Model fitting for retention - force error

Supplementary Table 6: Model fitting for retention – trial time

**Supplementary Results (pp. 6 – 7)**

Supplementary Table 7: Results of linear mixed models for acquisition

Supplementary Table 8: Results of linear mixed models for retention

**Supplementary Methods**

**Linear Mixed Model Fitting**

Tables S1-S6 include a summary of model comparisons. For skill measure, force error and trial time models, variables and interactions were added based on theoretical interest and retained where model fit was improved. Model comparisons were conducted with maximum likelihood estimation. In cases where Chi-square comparisons between models were non-significant, the more parsimonious model was selected.

**Table S1.** *Model fitting for acquisition - skill measure.*

|  | | N total obs = 230; N Subjects = 23; N blocks = 10 | | | **Model Fit** | | | **LRT Test against comparison** | |
| --- | --- | --- | --- | --- | --- | --- | --- | --- | --- |
| **Model Specification** | **Model Name** | **Compared Model** | **Model description** | **Random Effects** | **AIC** | **BIC** | **LL** | χ2 | *p* |
| RE only | Null |  | Skill ~ (1 | Participant) | Participant | 197.85 | 208.16 | -95.93 |  |  |
|  | Skill 1 | Null | Skill ~ (1|Block) + (1| Participant) | Participant, Block | 141.15 | 154.90 | -66.57 | 58.70 | <.001* |
|  | Skill 2 | Skill 1 | Skill ~ (Block | Participant) | Participant, Block | 137.81 | 155.00 | -63.91 | 5.34 | .02* |
|  | Skill 3 | Skill 2 | Skill ~ (Block | Participant) + (1 | Age) | Participant, Block, Age | 139.81 | 160.44 | -63.91 | <.001 | >.99 |
|  | Skill 4 | Skill 2 | Skill ~ (Block | Participant) + (1 | Fitness) | Participant, Block, Fitness | Model failed to converge | | |  |  |
| FE main effects | Skill 4 | Skill 2 | Skill ~ Group + Block + Age + (Block | Participant) | Participant, Block | 119.65 | 147.16 | -51.83 | 24.16 | <.001* |
|  | Skill 5 | Skill 4 | Skill ~ Group + Block + Age + Sex + Fitness (Block | Participant) | Participant, Block | 115.08 | 149.46 | -47.54 | 8.57 | .01* |
| FE Interactions | Skill 6 |  | Skill ~ Group × Block + Age + Sex + Fitness + (Block | Participant) | Participant, Block | 114.50 | 152.32 | -46.25 |  |  |
|  | **Skill 7** | **Skill 6** | **Skill ~ Group** × **Block** × **Age + Sex + Fitness + (Block | Participant)** | **Participant, Block** | **106.15** | **154.28** | **-39.08** | **14.35** | **.002*** |
|  | Skill 8 | Skill 7 | Skill ~ Group × Block × Sex + Age + Fitness + (Block | Participant) | Participant, Block | 117.97 | 166.11 | -44.99 | 2.52 | 0.47 |
|  | Skill 9 | Skill 7 | Skill ~ Group × Block × Fitness + Sex + Age + (Block | Participant) | Participant, Block | Model failed to converge | | |  |  |
|  | Skill 10 | Skill 7 | Skill ~ Group × Block × Age × Sex + Fitness + (Block | Participant) | Participant, Block | 111.19 | 183.39 | -34.60 | 8.96 | .26 |
|  | Skill 11 | Skill 7 | Skill ~ Group × Block × Age × Fitness + Sex + (Block | Participant) | Participant, Block | 111.09 | 183.29 | -34.55 | 9.06 | .25 |
|  |  |  |  |  |  |  |  |  |  |

Final selected model in bold.

**p* <0.5

**Table S2.** *Model fitting for acquisition – force error.*

|  | | N total obs = 230; N Subjects = 23; N blocks = 10 | | | | | **Model Fit** | | | | | **LRT Test against comparison** | | |
| --- | --- | --- | --- | --- | --- | --- | --- | --- | --- | --- | --- | --- | --- | --- |
| **Model Specification** | **Model Name** | **Compared Model** | **Model description** | | **Random Effects** | | **AIC** | | **BIC** | | **LL** | χ2 | | *p* |
| RE only | Null |  | Force Error ~ (1|Participant) | Participant | | -736.94 | | -726.62 | | 371.47 | |  |  | |
|  | Error 1 | Null | Force Error ~ (1|Block) + (1|Participant) | Participant, Block | | -754.52 | | -740.77 | | 381.26 | | 19.59 | <.001* | |
|  | Error 2 | Error 1 | Force Error ~ (Block | Participant) | Participant, Block, | | -771.30 | | -754.11 | | 390.65 | | 18.78 | <.001* | |
|  | Error 3 | Error 2 | Force Error ~ (Block | Participant) + (1|Age) | Participant, Block, Age | | -769.30 | | -748.67 | | 390.65 | | .002 | .96 | |
|  | Error 4 | Error 2 | Force Error ~ (Block | Participant) + (1|Fitness) | Participant, Block, Fitness | | Model failed to converge | | | | | |  |  | |
| FE main effects | Error 5 | Error 2 | Force Error ~ Group + Block + Age + (Block | Participant) | Participant, Block | | -776.82 | | -749.32 | | 396.41 | | 11.53 | .009* | |
|  | Error 6 | Error 5 | Force Error ~ Group + Block + Age + Sex + Fitness + (Block | Participant) | Participant, Block | | -780.84 | | -746.45 | | 400.42 | | 8.01 | .02* | |
| FE Interactions | Error 7 |  | Force Error ~ Group **×** Block + Age + Fitness + Sex + (Block | Participant) | Participant, Block | | -776.40 | | -742.02 | | 398.20 | |  |  | |
|  | Error 8 | Error 7 | Force Error ~ Group **×** Block **×** Age + Sex + Fitness + (Block | Participant) | Participant, Block | | Model failed to converge | | | | | |  |  | |
|  | **Error 9** | **Error 7** | **Force Error ~ Group × Block × Age + Sex + Fitness + (1|Block) + (1|Participant)** | **Participant** | | **-778.72** | | **-734.03** | | **402.36** | | **8.32** | **.04*** | |

Final selected model in bold. **p* <0.5

**Table S3.** *Model fitting for acquisition – trial time*

|  | | N total obs = 230; N Subjects = 23; N blocks = 10 | | | **Model Fit** | | | **LRT Test against comparison** | |
| --- | --- | --- | --- | --- | --- | --- | --- | --- | --- |
| **Model Specification** | **Model Name** | **Compared Model** | **Model description** | **Random Effects** | **AIC** | **BIC** | **LL** | χ2 | *p* |
| RE only | Null |  | Trial Time ~ (1 | Participant) | Participant | 262.49 | 272.81 | -128.25 |  |  |
|  | Time 1 | Null | Trial Time ~ (1 | Block) +(1 | Participant) | Participant, Block | 235.53 | 249.29 | -113.77 | 28.96 | <.001* |
|  | Time 2 | Time 1 | Trial Time ~ (Block | Participant) | Participant, Block | 151.08 | 168.27 | -70.54 | 86.45 | <.001* |
|  | Time 3 | Time 2 | Trial Time ~ (Block | Participant) + (1 | Age) | Participant, Block, Age | 153.08 | 173.71 | -70.54 | <.001 | >.99 |
|  | Time 4 | Time 2 | Trial Time ~ (Block | Participant) + (1 | Fitness) | Participant, Block, Fitness | 153.08 | 173.71 | -70.54 | <.001 | >.99 |
| FE main effects | Time 5 | Time 2 | Trial Time ~ Group + Block + Age + (Block | Participant) | Participant, Block | 143.30 | 170.80 | -63.65 | 13.78 | .003* |
|  | Time 4 | Time 3 | Trial Time ~ Group + Block + Age + Sex + Fitness + (Block | Participant) | Participant, Block | 146.25 | 180.63 | -63.12 | 1.05 | .59 |
| FE Interactions | Time 5 |  | Trial Time ~ Group × Block + Age + (Block | Participant) | Participant, Block | 146.25 | 180.63 | -63.12 |  |  |
|  | **Time 6** | **Time 5** | **Trial Time ~ Group** × **Block** × **Age (Block | Participant)** | **Participant, Block** | **141.66** | **182.91** | **-58.83** | **9.55** | **.02*** |

Final selected model in bold. **p* <0.5

**Table S4.** *Model fitting for retention – skill measure*

|  | | N total obs = 46; N Subjects = 23; N time = 2 | | | **Model Fit** | | | **LRT Test against comparison** | |
| --- | --- | --- | --- | --- | --- | --- | --- | --- | --- |
| **Model Specification** | **Model Name** | **Compared Model** | **Model description** | **Random Effects** | **AIC** | **BIC** | **LL** | χ2 | *p* |
| RE only | Null |  | Skill ~ (1| Participant) | Participant | 49.69 | 55.18 | -21.85 |  |  |
|  | SR 1 | Null | Skill ~ (1 |Fitness) + (1| Participant) | Participant, fitness | 51.69 | 59.01 | -21.85 | <.001 | >.99 |
|  | SR 2 | SR 1 | Skill ~ 1 | Participant) + (1 | Age) | Participant, age | 51.69 | 59.00 | -21.85 | .001 | .97 |
| FE main effects | SR 4 | SR 2 | Skill ~ Group + Time + (1 | Participant) | Participant | 44.02 | 53.17 | -17.01 | 9.67 | .01* |
|  | SR 5 | SR 4 | Skill ~ Group + Time + Age + Fitness + Sex + (1 | Participant) | Participant | 40.97 | 55.60 | -12.47 | 9.05 | .03* |
| FE Interactions | **SR 6** |  | **Skill ~ Group** × **Time + Age + Fitness + Sex + (1 | Participant)** | **Participant** | **37.21** | **53.67** | **-9.60** |  |  |
|  | SR 8 | SR 6 | Skill ~ Group × Time × Age  + Sex + Fitness + (1 | Participant) | Participant | 39.12 | 61.07 | -7.56 | 4.09 | .25 |
|  | SR 9 | SR 6 | Skill ~ Group × Time × Fitness  + Sex + Age + (1 | Participant) | Participant | 40.82 | 67.77 | -8.41 | 2.39 | .50 |
|  | SR 10 | SR 6 | Skill ~ Group × Time × Sex  + Sex + Age + (1 | Participant) | Participant | 39.22 | 61.17 | -7.61 | 3.98 | .26 |

Final selected model in bold. **p* <0.5

**Table S5.** *Model fitting for retention – force error*

|  | | N total obs = 46; N Subjects = 23; N time = 2 | | | **Model Fit** | | | **LRT Test against comparison** | |
| --- | --- | --- | --- | --- | --- | --- | --- | --- | --- |
| **Model Specification** | **Model Name** | **Compared Model** | **Model description** | **Random Effects** | **AIC** | **BIC** | **LL** | χ2 | *p* |
| RE only | Null |  | Force Error ~ (1| Participant) | Participant | -126.91 | -121.43 | 66.46 |  |  |
|  | ER 1 | Null | Force Error ~ (1 |Fitness) + (1| Participant) | Participant, fitness | model failed to converge | | |  |  |
|  | ER 2 | ER 1 | Skill ~ 1 | Participant) + (1 | Age) | Participant, age | -125.06 | -117.75 | 66.53 | 0.15 | .70 |
| FE main effects | ER 3 | Null | Force Error ~ Group + Time + (1 | Participant) | Participant | -126.97 | -117.83 | 68.49 | 4.06 | .13 |
|  | ER 4 | Null | Force Error ~ Group + Time + Age + Fitness + Sex + (1 | Participant) | Participant | -128.53 | -113.90 | 72.26 | 11.61 | .04* |
| **FE Interactions** | **ER 5** |  | **Force Error** **~ Group** × **Time + Age + Fitness + Sex + (1 | Participant)** | **Participant** | **-130.99** | **-114.53** | **74.49** |  |  |
|  | ER 6 | ER 5 | Force Error ~ Group × Time × Age + Sex + Fitness + (1 | Participant) | Participant | -131.21 | -109.26 | 77.60 | 6.22 | .10 |
|  | ER 7 | ER 5 | Force Error ~ Group × Time × Fitness + Sex + Age + (1 | Participant) | Participant | -127.82 | -105.88 | 75.91 | 2.83 | .42 |
|  | ER 8 | ER 5 | Force Error ~ Group × Time × Sex  + Sex + Age + (1 | Participant) | Participant | -125.83 | -103.89 | 74.92 | 0.84 | .84 |

Final selected model in bold. **p* <0.5

**Table S6.** *Model fitting for retention – trial time*

|  | | N total obs = 46; N Subjects = 23; N time = 2 | | | **Model Fit** | | | | | **LRT Test against comparison** | |
| --- | --- | --- | --- | --- | --- | --- | --- | --- | --- | --- | --- |
| **Model Specification** | **Model Name** | **Compared Model** | **Model description** | **Random Effects** | **AIC** | | **BIC** | **LL** | | χ2 | *p* |
| RE only | Null |  | Trial Time ~ (1| Participant) | Participant | 61.17 | | 66.65 | -27.58 | |  |  |
|  | TR 1 | Null | Trial Time ~ (1 |Fitness) + (1| Participant) | Participant, fitness | 63.17 | 70.48 | | | -27.58 | <.001 | >.99 |
|  | TR 2 | Null | Trial Time ~ 1 | Participant) + (1 | Age) | Participant, age | Model failed to converge | | | | |  |  |
| FE main effects | TR 3 | Null | Trial Time ~ Group + Time + (1 | Participant) | Participant | 61.86 | | 71.01 | -25.93 | | 3.30 | .19 |
|  | TR 4 | Null | Trial Time ~ Group + Time + Age + Fitness + Sex + (1 | Participant) | Participant | 66.61 | | 81.23 | -25.30 | | 4.56 | .47 |
| **FE Interactions** | **TR 5** |  | **Trial Time ~ Group** × **Time + (1 | Participant)** | **Participant** | **63.36** | | **74.34** | **-25.68** | |  |  |

Final selected model in bold. **p* <0.5

**Supplementary Results**

**Table S7**

Results of linear mixed models for acquisition across skill, force error and trial time measures

| **Parameter** | **Estimate (*SE*)** | **95% CI [lower, upper]** | **Test *(df)*** | ***p*** |
| --- | --- | --- | --- | --- |
|  | **Skill** | | | |
| Group (reference = rest) | -6.58 (2.75) | -12.01, -1.15 | *F*(1, 17.00) = 5.71 | **.03*** |
| Block | -0.05 (0.19) | -0.42, 0.32 | *F*(1, 19.00) = 2.30 | .14 |
| Age | -0.10 (0.03) | -0.17, -0.03 | *F*(1, 19.00) = 5.74 | **.03*** |
| Younger-old vs older | 0.71 (0.27) | 0.13, 1.28 | *t*(17.06) = 2.59 | **.02*** |
| Fitness (VO2peak) | -0.03 (0.01) | -0.05, -0.01 | *F*(1, 17.00) = 7.71 | **.01*** |
| Sex (reference = male) | -0.52(0.23) | -0.97, -0.07 | *F*(1, 17.00) = 5.18 | **.04*** |
| Group × Block | 0.44 (0.22) | 0.00, 0.89 | *F*(1, 19.00)= 3.91 | .06 |
| Group × Age | 0.10 (0.04) | 0.02, 0.18 | *F*(1, 17.00) = 5.60 | .**03*** |
| Block × Age | 0.002 (0.003) | 0.00, 0.01 | *F*(1, 19.00) = 1.18 | .29 |
| Group × Block × Age | -.007 (0.003) | -0.01, 0.00 | *F*(1, 19.00) = 4.61 | **.05*** |
| Condition × Block trend |  |  |  |  |
| Younger-old (rest) | 0.06 (0.02) | 0.01, 0.11 | *t*(19.00) = 2.66 | **.03*** |
| Younger-old (exercise) | 0.06 (0.01) | 0.03, 0.09 | *t*(19.00) = 4.51 | **.001*** |
| Older (rest) | 0.08 (0.02) | 0.03, 0.12 | *t*(19.00) = 4.40 | **.001*** |
| Older (exercise) | -0.001 (0.02) | -0.04, -0.08 | *t*(19.00) = -0.08 | >.99 |
|  | **Force Error** | | | |
| Group (reference = rest) | 1.04 (0.47) | 0.10, 1.97 | *F*(1, 19.76) = 4.81 | **.04*** |
| Block | 0.004 (0.02) | -0.04, 0.03 | *F*(1, 197.96) = 6.57 | **.01*** |
| Age | 0.01 (0.01) | 0.00, 0.02 | *F*(1, 19.55) = 2.35 | .14 |
| Fitness (VO2peak) | 0.003 (0.002) | 0.00, 0.01 | *F*(1, 17.00) = 2.71 | .12 |
| Sex (reference = male) | 0.08 (0.04) | 0.00, 0.15 | *F*(1, 17.00) = 4.03 | .06 |
| Group × Block | -0.05 (0.01) | -0.10, -0.01 | *F*(1, 195.00) =2.21 | **.03*** |
| Group × Age | -0.02 (0.01) | -0.03, 0.00 | *F*(1, 19.78) = 4.82 | **.04*** |
| Block × Age | 0.001 (<.001) | -0.001, 0.001 | *F*(1, 195.00) = 4.93 | **.03*** |
| Group × Block × Age | 0.001 (<.001) | 0.00, 0.001 | *F*(1, 195.00) = 5.70 | **.02*** |
| Condition × Block trend |  |  |  |  |
| Younger-old (rest) | -0.01 (0.002) | -0.01, -0.001 | *t*(112.8) = -2.54 | **.02*** |
| Younger-old (exercise) | -0.01 (0.002) | -0.01, -0.003 | *t*(35.4) = -4.34 | **<.001*** |
| Older (rest) | -0.01 (0.002) | -0.01, -0.002 | *t*(72.2) = -3.20 | **.004*** |
| Older (exercise) | 0.002 (0.002) | -0.002, 0.01 | *t*(80.5) = 1.22 | .45 |
|  | **Trial Time** | | | |
| Group (reference = rest) | -2.62 (3.06) | -8.66, 3.42 | *F*(1, 19.00) = 0.73 | .40 |
| Block | 0.83 (0.35) | 0.15, 1.51 | *F*(1, 19.00) = 6.28 | **.02*** |
| Age | 0.02 (0.04) | -0.05, 0.09 | *F*(1, 19.00) = 3.25 | .09 |
| Group × Block | -0.62 (0.41) | -1.44, 0.20 | *F*(1, 19.00) = 2.23 | .15 |
| Group × Age | .0432 (0.05) | -0.05, 0.13 | *F*(1, 19.00) = 0.90 | .35 |
| Block × Age | -0.01 (0.01) | -0.02, 0.00 | *F*(1, 19.00) = 7.62 | **.01*** |
| Younger-old | -0.002 (0.02) | -0.06, 0.05 | *t*(19.00) = -0.09 | >.99 |
| Older | -0.09 (0.02) | -0.14, -0.04 | *t*(19.00) = -4.38 | **.001*** |
| Group × Block × Age | 0.01 (0.01) | 0.00, 0.02 | *F*(1, 19.00) = 2.18 | .16 |

Df = degrees of freedom. *F* statistic derived from type III ANOVA. Pairwise comparisons and trends are indented.

**p* >.05

**Table S8**

Results of linear mixed models for retention across skill, force error and trial time measures

| **Parameter** | **Estimate (*SE*)** | **95% CI** | **Test *(df)*** | ***p*** |
| --- | --- | --- | --- | --- |
|  | **Skill** | | | |
| Group (reference = rest) | -0.42 (1.92) | 2.05, 9.82 | *F*(1, 18) = 1.79 | **.**20 |
| Time (reference = T1) | -0.23 (0.06) | -0.34, -0.12 | *F*(1,21) = 10.53 | .004* |
| Age | -0.05 (0.02) | -0.10, 0.00 | *F*(1,18) = 4.16 | .06 |
| Fitness (VO2peak) | -0.02 (0.01) | -0.05, 0.00 | *F*(1,18) = 2.77 | .11 |
| Sex (reference = male) | -0.52(0.23) | -0.97, -0.07 | *F*(1,18) = 4.79 | **.04*** |
| Group × Time | 0.20 (0.08) | 0.03, 0.36 | *F*(1,21) = 5.98 | **.02*** |
| Rest (T2 vs T1) | -0.23 (0.06) | -0.35, -0.11 | *t*(21) = -4.11 | **.002*** |
| Exercise (T2 vs T1) | -0.03 (0.06) | -0.15, 0.09 | *t*(21) = -0.55 | >.99 |
|  | **Force Error** | | | |
| Group (reference = rest) | 0.04 (0.04) | -0.04, 0.12 | *F*(1, 18) = 0.45 | **.**51 |
| Time (reference = T1) | 0.03 (0.01) | 0.01, 0.04 | *F*(1,21) = 3.92 | .06 |
| Age | 0.01 (<0.001) | 0.00, 0.02 | *F*(1,18) = 3.13 | .09 |
| Fitness (VO2peak) | <0.001 (<0.001) | 0.00, 0.01 | *F*(1,18) = 2.06 | .17 |
| Sex (reference = male) | 0.09 (0.04) | 0.00, 0.18 | *F*(1,18) = 4.07 | .06 |
| Group × Time | -0.03 (0.01) | -0.05, 0.00 | *F*(1,21) = 4.50 | **.05*** |
| Rest (T2 vs T1) | 0.03 (0.01) | 0.01, 0.04 | *t*(21) = 2.97 | **.01*** |
| Exercise (T2 vs T1) | -0.001 (0.01) | -0.02, 0.02 | *t*(21) = -0.10 | >.99 |
|  | **Trial Time** | | | |
| Group (reference = rest) | 0.15 0.32 | -0.51, 0.80 | *F*(1, 18) = 0.35 | .56 |
| Time (reference = T1) | 0.06 0.08 | -0.10, 0.23 | *F*(1,21) = 3.02 | .10 |
| Group × Time | 0.08 (0.12) | -0.16, 0.32 | *F*(1,21) = 0.46 | .51 |

Df = degrees of freedom. *F* statistic derived from type III ANOVA.

Pairwise comparisons and trends are indented.

**p* >.05
